# Supplementary material for: IoT-based control and monitoring system for hydroponic plant growth using image processing and mobile applications
Source: PeerJ Comput Sci. 2025 Mar 28;11:e2763. doi: 10.7717/peerj-cs.2763 (PMC12190697; doi:10.7717/peerj-cs.2763)
Supplement: Supplemental Information 3 [file peerj-cs-11-2763-s003.xlsx]

## Sheet: Form Responses 1
Timestamp	Nama	Saya merasa nyaman menggunakan HydroFarm	Saya merasa fitur-fitur dalam HydroFarm terlalu rumit untuk digunakan	Saya merasa bahwa HydroFarm mudah digunakan	Saya pikir saya akan memerlukan bantuan teknis untuk dapat menggunakan HydroFarm dengan baik	Fitur-fitur yang ada dalam HydroFarm terintegrasi dengan baik	Saya merasa ada terlalu banyak inkonsistensi dalam HydroFarm	Saya merasa kebanyakan orang dapat mempelajari cara menggunakan HydroFarm dengan cepat	Saya merasa HydroFarm terlalu membingungkan untuk digunakan.	Saya merasa percaya diri ketika menggunakan HydroFarm.	Saya perlu mempelajari banyak hal sebelum saya bisa menggunakan HydroFarm.	Saran dan Masukan
2024-09-13 11:00:20	Responden 1	4	1	4	1	5	1	4	2	5	1	Coba bisa custom tema
2024-09-13 11:00:33	Responden 2	4	2	4	2	4	2	4	2	4	2	Semoga kedepannya fitur ditambah lagi
2024-09-13 11:00:48	Responden 3	4	1	4	1	4	1	4	1	4	1	tidak ada
2024-09-13 11:04:27	Responden 4	5	3	3	3	2	3	4	3	3	4	mantapp
2024-09-13 11:04:50	Responden 5	4	2	5	2	5	2	4	1	5	1	Optimalkan sistem
2024-09-13 11:04:59	Responden 6	4	3	3	4	4	2	3	2	3	4	bagus dan lanjutkan
2024-09-13 11:07:04	Responden 7	5	5	5	5	4	3	3	3	3	3	-
2024-09-13 11:09:44	Responden 8	4	1	5	2	4	2	5	2	4	2	-
2024-09-13 11:10:01	Responden 9	5	1	5	4	5	4	5	1	5	5	mantap, kata saya mah ini aja tinggal ui yang kalo bulet mending bulet sekalian radiusnya 👍
2024-09-13 11:17:51	Responden 10	5	1	5	5	5	1	5	1	5	5	sudah bagus tinggal improvement aja
2024-09-13 11:35:21	Responden 11	4	2	4	2	5	2	4	2	4	2	UI dibuat lebih menarik lagi seperti penambahan animasi dan transisi
2024-09-13 11:35:27	Responden 12	5	1	5	1	5	1	5	1	5	1	sudah cukup bagus
2024-09-13 11:39:44	Responden 13	5	1	5	1	5	1	5	1	5	1	sudahh bagusss! bisa ditingkatkan lagi kedepannya
2024-09-13 11:42:49	Responden 14	5	1	5	1	5	1	5	1	5	1	Sangat baik
2024-09-13 12:01:10	Responden 15	5	1	5	1	5	1	5	1	5	1	sudah cukup baik mungkin bisa ditambahkan fitur seperti pengingat pemberian nutrisi pd tumbuhan atau lainnya.
2024-09-13 12:26:48	Responden 16	5	1	5	1	5	1	5	1	5	1	Aplikasinya bisa di maintain lebih baik lagi kadang kadang suka bug. Untuk selebihnya sudah bagus 👍
2024-09-13 12:56:44	Responden 17	3	2	3	4	3	3	4	3	4	2	Size dan ketebalan font bisa disesuaikan lagi. Warna juga lebih dikontraskan terutama antara font dan backgroundnya untuk menjaga keterbacaan. Lalu di bagian automatic dan manual agak bingung, sepaham saya harusnya klik dan isi manual target nutrisi dibagian manual namun saat dicoba yang bisa klik dan isi manual malah di bagian automatic, apakah memang dibuat seperti itu
2024-09-13 13:12:45	Responden 18	4	1	4	3	3	1	2	4	4	2	UI/UX nya bisa dioptimalisasi lagi
2024-09-13 13:40:39	Responden 19	5	1	5	1	5	1	5	1	5	1	Pastikan aplikasi dapat menampilkan data secara real-time, memberikan notifikasi untuk tindakan penting, serta memungkinkan kendali jarak jauh.
2024-09-13 13:55:23	Responden 20	5	1	5	1	5	1	5	1	5	1	HydroFarm membutuhkan fitur penjadwalan per harinya
