# Supplementary material for: IoT-based control and monitoring system for hydroponic plant growth using image processing and mobile applications
Source: PeerJ Comput Sci. 2025 Mar 28;11:e2763. doi: 10.7717/peerj-cs.2763 (PMC12190697; doi:10.7717/peerj-cs.2763)
Supplement: Supplemental Information 4 [file peerj-cs-11-2763-s004.xlsx]

## Sheet: Form Responses 1
Timestamp	Name	I feel comfortable using HydroFarm	I find the features in HydroFarm too complex to use	I find HydroFarm easy to use	I think I would need technical support to use HydroFarm effectively	The features in HydroFarm are well-integrated	I find too much inconsistency within HydroFarm	I believe most people can learn to use HydroFarm quickly	I find HydroFarm too confusing to use	I feel confident using HydroFarm	I need to learn a lot before I can effectively use HydroFarm	Suggestions
2024-09-13 11:00:20	Respondent 1	4	1	4	1	5	1	4	2	5	1	Try customizing the theme
2024-09-13 11:00:33	Respondent 2	4	2	4	2	4	2	4	2	4	2	Hopefully more features will be added in the future
2024-09-13 11:00:48	Respondent 3	4	1	4	1	4	1	4	1	4	1	There isn't any
2024-09-13 11:04:27	Respondent 4	5	3	3	3	2	3	4	3	3	4	awesome
2024-09-13 11:04:50	Respondent 5	4	2	5	2	5	2	4	1	5	1	Optimize the system
2024-09-13 11:04:59	Respondent 6	4	3	3	4	4	2	3	2	3	4	good and continue
2024-09-13 11:07:04	Respondent 7	5	5	5	5	4	3	3	3	3	3	-
2024-09-13 11:09:44	Respondent 8	4	1	5	2	4	2	5	2	4	2	-
2024-09-13 11:10:01	Respondent 9	5	1	5	4	5	4	5	1	5	5	Great, I said this is it, just leave the UI, if it's round, it's better to make it round with the radius 👍
2024-09-13 11:17:51	Respondent 10	5	1	5	5	5	1	5	1	5	5	It's good, just needs improvement
2024-09-13 11:35:21	Respondent 11	4	2	4	2	5	2	4	2	4	2	The UI is made even more attractive, such as by adding animations and transitions.
2024-09-13 11:35:27	Respondent 12	5	1	5	1	5	1	5	1	5	1	it's good enough
2024-09-13 11:39:44	Respondent 13	5	1	5	1	5	1	5	1	5	1	It's good! It can be improved in the future
2024-09-13 11:42:49	Respondent 14	5	1	5	1	5	1	5	1	5	1	Very good
2024-09-13 12:01:10	Respondent 15	5	1	5	1	5	1	5	1	5	1	It's good enough, maybe features could be added such as reminders for giving nutrients to plants or others.
2024-09-13 12:26:48	Respondent 16	5	1	5	1	5	1	5	1	5	1	The application can be maintained better sometimes it has bugs. For the rest it's good 👍
2024-09-13 12:56:44	Respondent 17	3	2	3	4	3	3	4	3	4	2	The font size and thickness can be adjusted again. The colors are also more contrasted, especially between the font and the background to maintain readability. Then in the automatic and manual sections it's a bit confusing, as far as I know you should click and fill in the nutritional target manually in the manual section, but when I tried it, what I could click and fill in manually was in the au…
2024-09-13 13:12:45	Respondent 18	4	1	4	3	3	1	2	4	4	2	The UI/UX can be optimized again
2024-09-13 13:40:39	Respondent 19	5	1	5	1	5	1	5	1	5	1	Make sure the app can display data in real-time, provide notifications for important actions, and allow remote control.
2024-09-13 13:55:23	Respondent 20	5	1	5	1	5	1	5	1	5	1	HydroFarm requires a daily scheduling feature
